# Supplementary material for: Jumonji domain containing protein 6 (Jmjd6) modulates splicing and specifically interacts with arginine–serine-rich (RS) domains of SR- and SR-like proteins
Source: Nucleic Acids Res. 2014 Jun 9;42(12):7833–50. doi: 10.1093/nar/gku488 (PMC4081092; doi:10.1093/nar/gku488)
Supplement: SUPPORTING INFORMATION [file supp_gku488_nar-02988-a-2013-File012.pdf]

**figure S1**

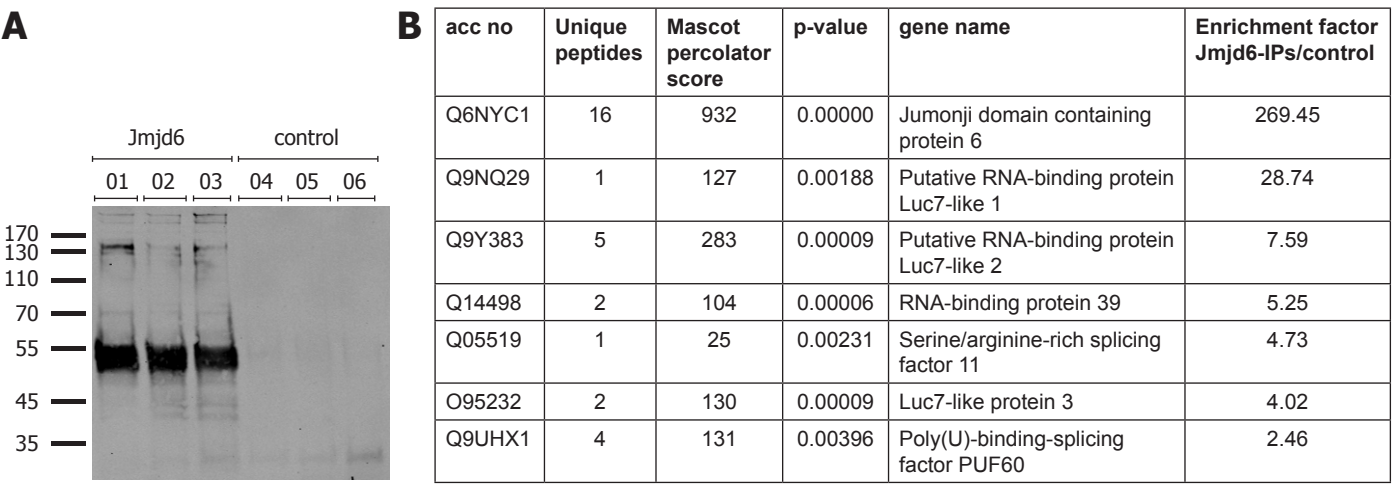

**Figure S1:** Immunoprecipitation experiments of endogenous Jmjd6 from HeLa cells. **(A)** Western blot stained with anti-Jmjd6 antibody (sc28348, Santa Cruz) showing the final beads fractions of three independent anti-Jmjd6 pulldown experiments (01-03) and three independent corresponding control (Merck Millipore) experiments (04-06). **(B)** Anti-Jmjd6 and control samples have been analysed by label-free LC-MS/MS analysis and abundance of co-immunoprecipitated proteins has been analysed. Table indicates enrichment factor of Jmjd6 and co-immunoprecipitated SR-proteins in anti-Jmjd6 samples in comparison to control samples. Mass spectrometry analyses summarise the protein identifications of the samples 01-06 shown in (A).

**figure S2**

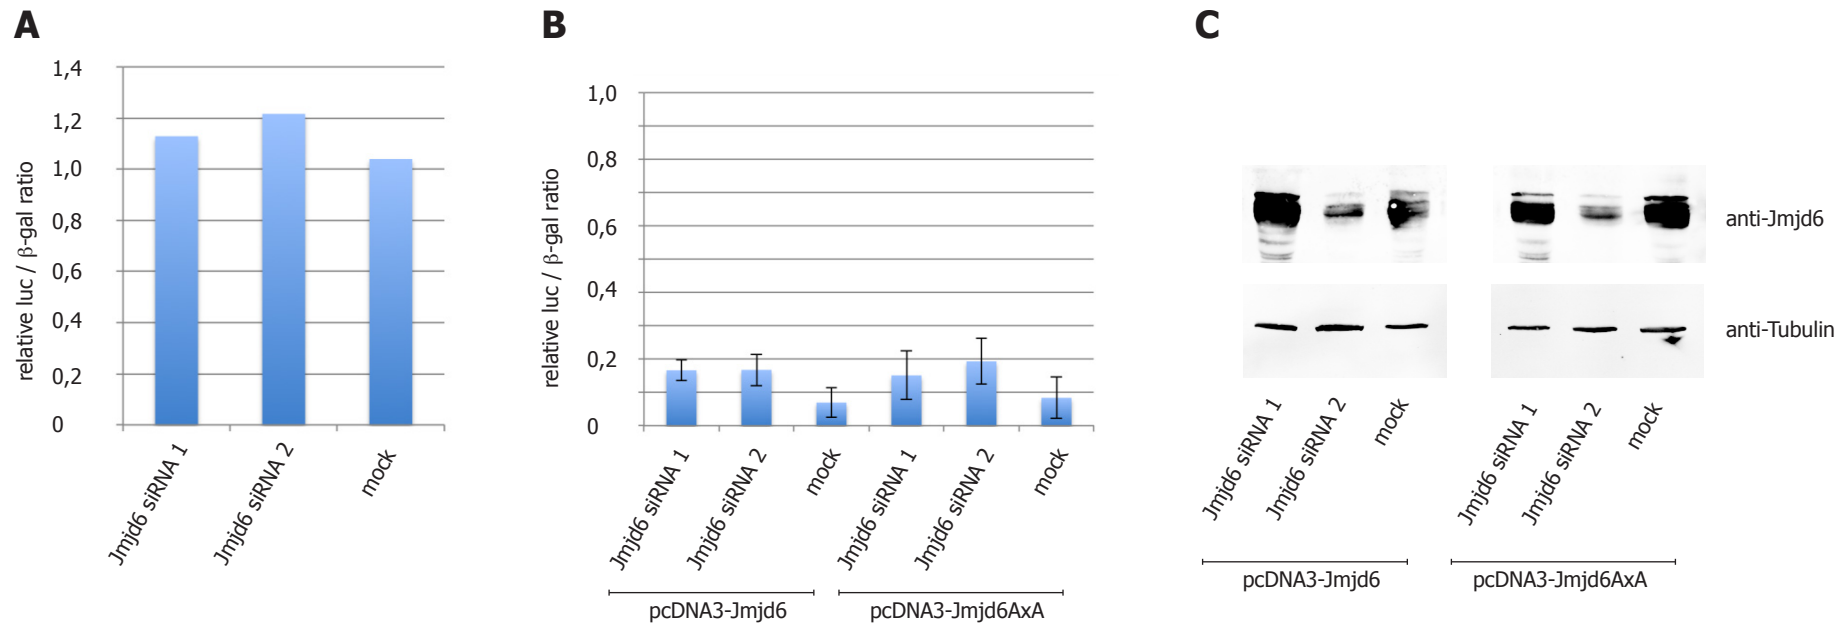

**Figure S2:** Rescue experiments after Jmjd6 knockdown in HeLa cells. siRNA-mediated knockdown of endogenous Jmjd6 increases splicing activity (**A**) + (**Fig. 9**). A subsequent transient expression of wildtype Jmjd6 in the Jmjd6 knock down cells reduces splicing activity in the double-reporter splicing assay. A similar effect was observed for an enzymatically inactive Jmjd6AxA variant (**B**). Nucleotide sequence of the pcDNA3-Jmjd6 and pcDNA3-Jmjd6AxA constructs has been changed in order to avoid binding by siRNA1. Nucleotide changes did not result in a change in amino acid sequence (see material & methods). Jmjd6 levels were detected in immuno blots (**C**).

## figure S3

### A

SRSF11 (245-394):

**RRHSRSRSRSRRRTTPSSSRHRRSRSRSRRRSHSKSRSRRRSKSPRRRRSHSRERGRRSRTSKTRDKKKEDKEKKRSKTPPKSYSTARRSRSASRERRRRRSRSGTRSPKKPRSPKRLSRSPPRRHKKEKKDKDKERSRDERERS**

Luc7like3 (292-432):

**RARDRERRKRSSRSRSHSSRTSDRRCRSRSDHKRSRSRERRRSRSRDRRRRSRSHDRSEKHSRSRDRRRSKSRDRKSYKHRSKSRDREQDRKSKEKEKRGSDDKKSSVKSGSREKQSEDNTNTESKESDTEKNEVNGTSEDIKSEGDTQSN**

U2AF65 (21-70):

**ENRRHRRSHSRSRSRDRKRRSRSRDRNRDQRSASRDRRRRSKPLTRGA**

Acinus S' (447-510):

**PRSSRSRDRRRKERAKSKEKKSEKKEKAQEEPPAKLLDDLFRKTKAAPCIYWLPLTDSQIVQK**

### B

SRSF1 (198-247):

**RSPSYGRSRSRSRSRSRSRSNSRSRSYSPPRRSRGSPRYSPRHRSRSRT**

**Figure S3:** Jmjd6 interacts with RS-domains of several SR-like proteins. Amino acid sequences of the Jmjd6-interacting domains of SRSF11, Luc7like3, U2AF65 and Acinus S' as validated in co-immunoprecipitation (co-IP) experiments (**A**). The RS-domain of SRSF1 is not bound by Jmjd6 in these co-IP experiments (**B**).
